# Supplementary material
Source: Research Square preprint supplement (doi:10.21203/rs.3.rs-9785403/v1)
Supplement: Supplementary file 1 [file 8e0931986b408512a0a797cf.docx]

# Supplementary Information

**SI Appendix**

**Table S1** — Complete Symbol Definitions and Interpretation

**Supplementary Notes:**

# S1. Minimal Regulatory–Selection Dynamical System

# S2. Equilibria and Stability Analysis

S3. Saddle–Node Bifurcation Condition

S4. Structural Dominance Theorem

# S5. Structural Generalization

# S6. Slow–Fast Plasticity Dynamics

# S7. Mechanistic SRT Reduction

# S8. Polymorphism Extension

# S9. Unified Mathematical Conclusion

**Table S1 — Complete Symbol Definitions and Interpretation**

| **Symbol** | **Mathematical Role** | **Biological Interpretation** |
| --- | --- | --- |
| t | Independent variable | Evolutionary time |
| L(t) | State variable | System-level regulatory integration (degree of coordinated organization) |
| dL/dt | Time derivative | Rate of evolutionary change in integration |
| a | Linear coefficient | Effective selection/energetic gain parameter |
| b | Quadratic coefficient | Competitive or dissipative interactions among subsystems |
| c | Cubic coefficient | Nonlinear higher-order regulatory feedback (saturating interaction) |
| L* | Equilibrium solution | Stable long-term integration level |
| L1​,L2​ | Nontrivial equilibria (distinct roots of quadratic equation) | Alternative stable/unstable integration states |
| Δ=b2+4ac | Discriminant | Determines existence of real equilibria (additional constraints required for multistability) |
| J(L) | Jacobian | Local stability condition |
| Φ(L) | Feedback function | State-dependent regulatory coupling |
| E | Energetic input | Metabolic throughput sustaining organization |
| τ | Slow timescale | Adaptive regulatory adjustment |
| ε | Small parameter | Timescale separation (ε≪1) |
| Llow​ | Stable equilibrium | Low-integration regime |
| Lhigh​ | Stable equilibrium | High-integration regime |
| *a*=*b*2/(4*c*) | bifurcation threshold (Eq. (6)) | Saddle–node bifurcation point |
| ΔE | Energetic shift | Change in energy availability |
| H | Hysteresis width | Parameter interval of bistability |

***Table S1.******Complete list of symbols with mathematically precise definitions and biologically interpretable meanings used throughout the model and Supplementary derivations.***

# S1. Minimal Regulatory–Selection Dynamical System

We consider a continuous-time dynamical system for system-level integration:

*dL/dt = aL−bL2−cL3*

Assumptions:

1. Growth is proportional to current integration (*L*) (mass-action scaling).
2. Pairwise interactions generate quadratic saturation (−*bL*2).
3. Higher-order interactions produce additional nonlinear saturation (−*cL*3).
4. Parameters satisfy *a* ∈ R, *b* > 0, *c* ≥ 0.

**This cubic form represents the lowest-order polynomial capable of generating saddle–node bifurcations and multiple steady states in one-dimensional systems** (Strogatz 1994; Kuznetsov 1998).

It therefore provides a minimal normal form for describing topology changes in coarse-grained regulatory dynamics.

Derivation from higher-dimensional systems via reduction is provided in Section S7.

# S2. Equilibria and Stability Analysis

Equilibria satisfy:

*L*(*a−bL−cL2*) = 0

Thus:

- Trivial equilibrium: *L*0​ = 0
- Nontrivial equilibria satisfy:

*cL2 + bL – a* = 0

with discriminant:

Δ = *b*2 + 4*ac*

or c > 0, Δ > 0 for all a > 0, so two real roots always exist; however, multistability requires both roots to be dynamically admissible and separated by stability conditions.

The Jacobian is:

*J*(*L*) = *a −*2*bL−*3*cL*2

**A**n equilibrium *L** is locally stable if *J*(*L**) < 0.

A complete classification of equilibria and their stability regimes is provided, including parameter-dependent phase portraits.

# S3. Saddle–Node Bifurcation Condition

A saddle-node bifurcation occurs when:

*dL*/*dt* ​= 0, *J*(*L*) = 0

Solving simultaneously yields:

*a* = *b*2/(4*c*), (*c* > 0)

Refined regime statement:

- *a* < *b*2/(4*c*): single stable equilibrium (monostable regime)
- *a* > *b*2/(4*c*): two stable equilibria separated by one unstable equilibrium (bistable regime)

For *c* = 0, the system reduces to the logistic equation and cannot exhibit multistability.

The transversality condition is satisfied (SI S3), confirming a generic saddle–node bifurcation.

# S4. Structural Dominance Theorem

# Minor tightening (important for rigor):

Theorem 1 (Structural Dominance).

For the system with *a* > 0, *b* > 0, *c* ≥ 0:

1. Variation in *a* shifts equilibrium positions but does not change polynomial order.
2. Multiple equilibria require *c* > 0.
3. The saddle-node bifurcation occurs at *a* = *b*2/(4*c*).
4. Therefore, nonlinear feedback is necessary for attractor multiplicity, while control parameters determine its realization.

Proof:
Statements (1)–(3) follow from the quadratic equilibrium equation and Jacobian degeneracy condition.
When *c* = 0, the system reduces to a first-order polynomial in *L*, admitting at most one positive equilibrium. Thus, multiplicity requires *c* > 0.

# S5. Structural Generalization

Consider a general coupled system:

*x˙ = f(x,y), y˙ = g(x,y)*

Near a non-hyperbolic equilibrium, center manifold reduction (Carr 1981; Guckenheimer & Holmes 1983; Kuznetsov 1998) yields an effective one-dimensional dynamics of the form:

*dz/dt* *= αz − βz2 − γz3 + O(z4)*

# where coefficients depend on the underlying system parameters.

# The leading-order normal form near a saddle–node bifurcation is quadratic, while cubic terms represent the lowest-order correction capturing higher-order feedback effects. Thus, the cubic structure represents the lowest-order extension beyond the canonical saddle–node normal form required to capture feedback-mediated stabilization and global phase-space structure. Therefore, it is not model-specific but represents a robust reduced description of coupled regulatory dynamics under coarse-graining. This justifies the use of a cubic minimal model as the lowest-order polynomial capable of capturing both bifurcation structure and feedback-mediated stabilization within a unified framework.

# S6. Slow–Fast Plasticity Dynamics

Let regulatory reinforcement evolve dynamically:

c˙ *= ε*(Φ*(L*) − *c*), 0 < *ε* ≪ 1

Coupled system:

*dL/dt = aL−bL*2*−cL*3

Timescale separation:

- Fast variable: *L*
- Slow variable: *c*

Consequences:

- Critical slowing near bifurcation
- Hysteresis
- Path-dependent transitions

Geometric singular perturbation theory implies metastable regime switching and hysteresis near the bifurcation boundary (SI S3).

# S7. Mechanistic SRT Reduction

Stage-structured system:

*dL/dt =* Λ*L* − Θ*LRs*

*dRs/dt = γL + ηL2 − μRs*

Quasi-steady elimination:

*Rs​* = (*γL+ηL2*) / *μ*

Substitution yields:

*dL/dt* *= ΛL – (Θγ/μ)L*2 *– (Θη/μ)L*3

Thus:

*a* = Λ, *b* = Θγ / *μ*, *c* = Θη / *μ*

**This demonstrates that the cubic nonlinearity arises from hierarchical interaction structure, rather than being imposed phenomenologically.** In particular, the nonlinear reinforcement parameter *c* emerges from higher-order feedback interactions among regulatory subsystems, providing a mechanistic basis for the effective cubic term in the reduced dynamics **obtained under the quasi-steady reduction in this framework.**

# S8. Polymorphism Extension

For interacting subpopulations:

*dLi/dt* *= aLi − bLi2 − cLi*3 *+ η*(*Lj − Li*)

Linear coupling alone promotes homogenization, whereas nonlinear feedback (c > 0) enables the existence of multiple stable states and thereby supports stable coexistence (polymorphism). Formal proof is provided via Lyapunov analysis (SI S7).

# S9. Unified Mathematical Conclusion

The analysis establishes:

1. The selection parameter *a* acts as a control parameter shifting system position within phase space.
2. Nonlinear reinforcement *c* determines phase-space topology (number of equilibria).
3. Multistability requires *c* > 0.
4. Slow dynamics in *c* generate hysteresis and path dependence.
5. The cubic structure is structurally stable under model generalization.

Therefore, evolutionary regime structure is determined by internal regulatory feedback, while selection governs transitions between regimes.
